# Supplementary material
Source: PubMed Central journal article supplement (PMC4650542)

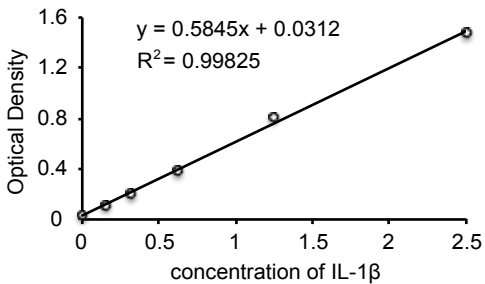

Supplement: cddis201573x2.pdf [file cddis201573x2.pdf]

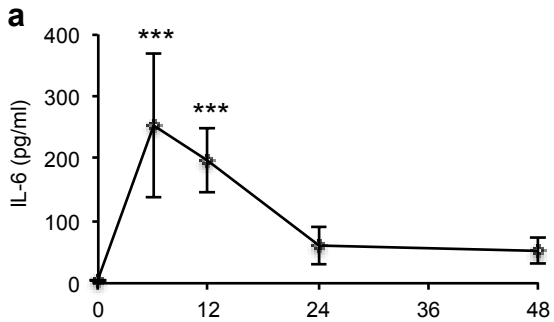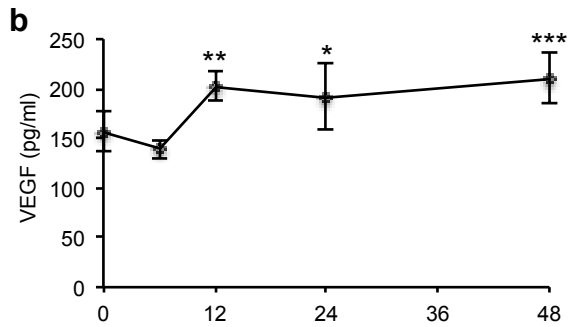

Supplement: cddis201573x4.pdf [file cddis201573x4.pdf]

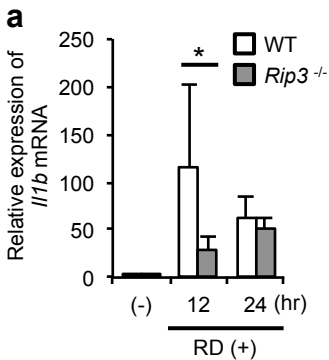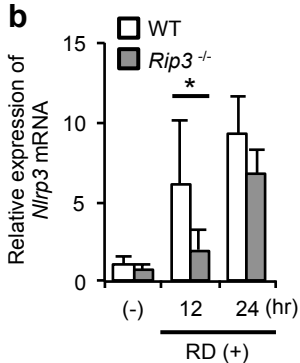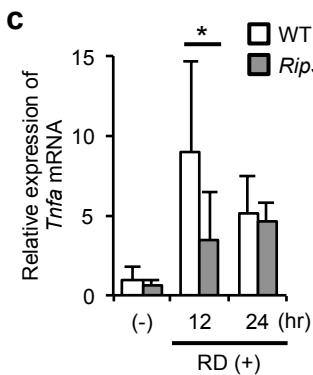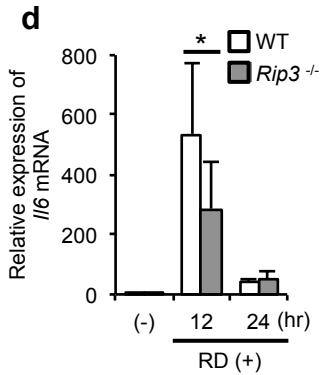

Supplement: cddis201573x5.pdf [file cddis201573x5.pdf]

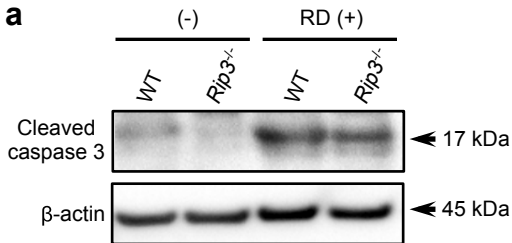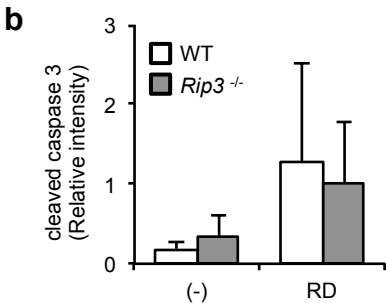

Supplement: cddis201573x6.pdf [file cddis201573x6.pdf]

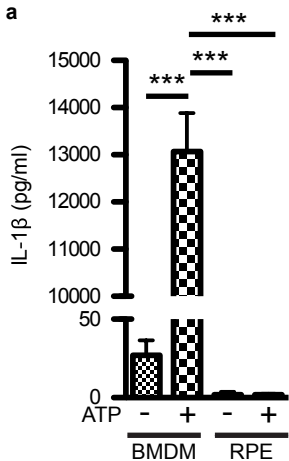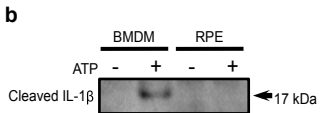

Supplement: cddis201573x7.pdf [file cddis201573x7.pdf]
